# Supplementary material
Source: publisher site journal article supplement (https://www.dovepress.com/article/326019)
Supplement: Supplementary file 1 [file get_supplementary_file.php]

# Appendix 1

Table 1 -6 with extended results for the selected subgroups.

Table 1: Comparing ward managers' answers from Survey I and Survey II

| No | Question                                                                                                       | N <sup>a</sup> | n  | Negative ranks | n  | Positive ranks | Ties, n | P     |
|----|----------------------------------------------------------------------------------------------------------------|----------------|----|----------------|----|----------------|---------|-------|
| 1  | I felt able to communicate quickly, clearly and transparently to my employees and collaborators                | 53             | 14 | 15.86          | 13 | 12.00          | 26      | 0.40  |
| 2  | I was able to work in a way that was consistent with my beliefs and values                                     | 53             | 21 | 16.24          | 10 | 15.50          | 22      | 0.05* |
| 3  | I have taken on management duties and responsibilities that I did not have before COVID-19                     | 53             | 18 | 17.53          | 14 | 15.18          | 21      | 0.32  |
| 4  | I had overview of the tasks my nearest leader assigned to me                                                   | 53             | 11 | 10.55          | 12 | 13.33          | 53      | 0.48  |
| 5  | I knew where to find factual knowledge of symptoms stage of the COVID-19 situation as it developed and disease | 53             | 11 | 13.27          | 14 | 12.79          | 28      | 0.63  |
| 6  | I was prepared for each stage of the COVID-19 situation as it developed                                        | 53             | 23 | 18.52          | 12 | 17.00          | 18      | 0.05* |
| 7  | I had meaningful tasks during the COVID-19 situation                                                           | 53             | 7  | 13.79          | 16 | 11.22          | 30      | 0.17  |
| 8  | I had influence on the decisions taken during the COVID-19 situation                                           | 53             | 21 | 20.05          | 15 | 16.33          | 17      | 0.14  |
| 9  | I took complex decisions during the COVID-19 situation                                                         | 53             | 20 | 18.30          | 15 | 17.60          | 18      | 0.39  |
| 10 | I had to assign staff to other tasks than they are employed to do                                              | 53             | 20 | 21.08          | 19 | 18.87          | 14      | 0.65  |
| 11 | I had to move / lend out staff to other units / departments                                                    | 53             | 11 | 12.91          | 15 | 13.93          | 27      | 0.39  |
| 12 | I had the necessary resources to effectively care for patients and staff                                       | 51             | 14 | 17.29          | 19 | 16.79          | 18      | 0.47  |
| 13 | I was able to ensure that that the patients' needs were met                                                    | 45             | 6  | 10.67          | 1  | 8.92           | 27      | 0.32  |
| 14 | I was able to answer patients' questions about COVID-19                                                        | 35             | 9  | 9.28           | 7  | 7.50           | 19      | 0.38  |
| 15 | I was concerned about the quality of treatment and care for our patients                                       | 43             | 12 | 16.25          | 20 | 16.65          | 11      | 0.18  |
| 16 | I was kept well informed by my own nearest leader                                                              | 53             | 10 | 9.20           | 8  | 9.88           | 35      | 0.76  |
| 17 | I was able to answer staff questions about COVID-19                                                            | 53             | 12 | 10.29          | 7  | 9.50           | 34      | 0.20  |
| 18 | I felt overloaded                                                                                              | 53             | 19 | 17.24          | 11 | 12.50          | 23      | 0.04* |
| 19 | I was concerned about the health and well-being of the staff                                                   | 53             | 18 | 19.50          | 18 | 17.50          | 17      | 0.76  |
| 20 | I was worried about my own health                                                                              | 53             | 22 | 15.80          | 7  | 12.50          | 24      | 0.00* |
| 21 | I was worried about my family's health                                                                         | 53             | 16 | 16.31          | 14 | 14.57          | 23      | 0.52  |
| 22 | I had the managerial competences I needed to effectively manage the situation                                  | 53             | 13 | 12.50          | 11 | 12.50          | 29      | 0.68  |
| 23 | Collaboration with the other leaders in my own department was adversely affected by the COVID-19 situation     | 53             | 16 | 16.81          | 15 | 15.13          | 22      | 0.67  |
| 24 | I experienced support from my leader colleagues in the rest of the organization                                | 53             | 15 | 16.13          | 16 | 15.88          | 22      | 0.90  |
| 25 | I was supported by the staff of my department / unit with the decisions I made                                 | 53             | 11 | 12.50          | 15 | 14.23          | 27      | 0.29  |
| 26 | The staff supported the decisions of the hospital management                                                   | 53             | 16 | 15.00          | 16 | 18.00          | 21      | 0.63  |
| 27 | I feel well prepared if a similar situation arise again                                                        | 53             | 18 | 15.83          | 12 | 15.00          | 23      | 0.22  |

Negative ranks (number of participants who scored lower in the second, than in the first questionnaire), positive ranks (number of participants who scored higher in the second, than in the first questionnaire), and ties (number of participants who scores the same in both questionnaires). Low scores represent "Always to Often" and high scores represent "Seldom to Never/Almost Never".

<sup>a</sup>The possibility to answer "not relevant in question 12 – 15 inflects on the N (and thereby the n's) as these answers are excluded to insure equality.

\* = P-values are considered significant when ≤ 0.05.

Table 2: Comparing Heads of Departments' answers from Survey I and Survey II

| No | Question                                                                                                       | N <sup>a</sup> | n  | Negative ranks | n  | Positive ranks | Ties | P     |
|----|----------------------------------------------------------------------------------------------------------------|----------------|----|----------------|----|----------------|------|-------|
| 1  | I felt able to communicate quickly, clearly and transparently to my employees and collaborators                | 30             | 6  | 5.50           | 4  | 5.50           | 20   | 0.53  |
| 2  | I was able to work in a way that was consistent with my beliefs and values                                     | 30             | 6  | 7.58           | 7  | 6.50           | 17   | 1.00  |
| 3  | I have taken on management duties and responsibilities that I did not have before COVID-19                     | 30             | 9  | 11.94          | 11 | 9.32           | 10   | 0.92  |
| 4  | I had overview of the tasks my nearest leader assigned to me                                                   | 30             | 13 | 9.15           | 4  | 8.50           | 13   | 0.03* |
| 5  | I knew where to find factual knowledge of symptoms stage of the COVID-19 situation as it developed and disease | 30             | 7  | 6.86           | 5  | 6.00           | 18   | 0.44  |
| 6  | I was prepared for each stage of the COVID-19 situation as it developed                                        | 30             | 15 | 13.33          | 8  | 9.50           | 7    | 0.05* |
| 7  | I had meaningful tasks during the COVID-19 situation                                                           | 30             | 9  | 7.00           | 3  | 5.00           | 18   | 0.05* |
| 8  | I had influence on the decisions taken during the COVID-19 situation                                           | 30             | 14 | 9.64           | 3  | 6.00           | 13   | 0.00* |
| 9  | I took complex decisions during the COVID-19 situation                                                         | 30             | 9  | 6.83           | 3  | 5.50           | 18   | 0.06  |
| 10 | I had to assign staff to other tasks than they are employed to do                                              | 30             | 10 | 8.35           | 9  | 11.83          | 11   | 0.63  |
| 11 | I had to move / lend out staff to other units / departments                                                    | 30             | 6  | 7.25           | 10 | 9.25           | 14   | 0.19  |
| 12 | I had the necessary resources to effectively care for patients and staff                                       | 27             | 5  | 4.80           | 3  | 4.00           | 19   | 0.37  |
| 13 | I was able to ensure that the patients' needs were met                                                         | 28             | 8  | 8.25           | 6  | 6.50           | 14   | 0.36  |
| 14 | I was able to answer patients' questions about COVID-19                                                        | 23             | 3  | 3.50           | 3  | 3.50           | 17   | 1.00  |
| 15 | I was concerned about the quality of treatment and care for our patients                                       | 27             | 5  | 6.30           | 10 | 8.85           | 12   | 0.10  |
| 16 | I was kept well informed by my own nearest leader                                                              | 30             | 12 | 8.13           | 3  | 7.50           | 15   | 0.02* |
| 17 | I was able to answer staff questions about COVID-19                                                            | 30             | 5  | 4.50           | 3  | 4.50           | 22   | 0.48  |
| 18 | I felt overloaded                                                                                              | 30             | 3  | 4.50           | 9  | 9.44           | 13   | 0.66  |
| 19 | I was concerned about the health and well-being of the staff                                                   | 30             | 8  | 8.44           | 8  | 8.56           | 14   | 0.98  |
| 20 | I was worried about my own health                                                                              | 30             | 10 | 8.80           | 6  | 8.00           | 14   | 0.25  |
| 21 | I was worried about my family's health                                                                         | 30             | 10 | 6.85           | 3  | 7.50           | 17   | 0.09  |
| 22 | I had the managerial competences I needed to effectively manage the situation                                  | 30             | 6  | 7.00           | 7  | 7.00           | 17   | 0.78  |
| 23 | Collaboration with the other leaders in my own department was adversely affected by the COVID-19 situation     | 30             | 10 | 7.15           | 5  | 9.70           | 15   | 0.50  |
| 24 | I experienced support from my leader colleagues in the rest of the organization                                | 30             | 8  | 6.75           | 8  | 6.75           | 18   | 0.20  |
| 25 | I was supported by the staff of my department / unit with the decisions I made                                 | 30             | 5  | 7.80           | 8  | 6.50           | 17   | 0.64  |
| 26 | The staff supported the decisions of the hospital management                                                   | 30             | 8  | 6.50           | 6  | 5.25           | 20   | 0.67  |
| 27 | I feel well prepared if a similar situation arise again                                                        | 30             | 10 | 8.30           | 6  | 8.83           | 14   | 0.40  |

Negative ranks (number of participants who scored lower in the second, than in the first questionnaire), positive ranks (number of participants who scored higher in the second, than in the first questionnaire), and ties (number of participants who scores the same in both questionnaires). Low scores represent "Always to Often" and high scores represent "Seldom to Never/Almost Never".

<sup>a</sup>The possibility to answer "not relevant in question 12 – 15 inflects on the N (and thereby the n's) as these answers are excluded to insure equality.

\* = P-values are considered significant when  $\leq 0.05$ .

Table 3: Comparing answers from Survey I and Survey II from leaders with no management education

| No | Question                                                                                                       | N <sup>a</sup> | n  | Negative ranks | n  | Positive ranks | Ties | P     |
|----|----------------------------------------------------------------------------------------------------------------|----------------|----|----------------|----|----------------|------|-------|
| 1  | I felt able to communicate quickly, clearly and transparently to my employees and collaborators                | 26             | 6  | 5.83           | 4  | 5.00           | 16   | 0.41  |
| 2  | I was able to work in a way that was consistent with my beliefs and values                                     | 26             | 7  | 5.50           | 4  | 6.88           | 15   | 0.59  |
| 3  | I have taken on management duties and responsibilities that I did not have before COVID-19                     | 26             | 8  | 8.00           | 7  | 8.00           | 11   | 0.82  |
| 4  | I had overview of the tasks my nearest leader assigned to me                                                   | 26             | 6  | 6.00           | 5  | 6.00           | 15   | 0.76  |
| 5  | I knew where to find factual knowledge of symptoms stage of the COVID-19 situation as it developed and disease | 26             | 4  | 5.00           | 5  | 5.00           | 17   | 0.74  |
| 6  | I was prepared for each stage of the COVID-19 situation as it developed                                        | 26             | 12 | 10.00          | 6  | 8.50           | 8    | 0.10  |
| 7  | I had meaningful tasks during the COVID-19 situation                                                           | 26             | 4  | 5.50           | 4  | 3.50           | 18   | 0.56  |
| 8  | I had influence on the decisions taken during the COVID-19 situation                                           | 26             | 13 | 11.38          | 6  | 7.00           | 7    | 0.03* |
| 9  | I took complex decisions during the COVID-19 situation                                                         | 26             | 10 | 6.65           | 3  | 8.17           | 13   | 0.12  |
| 10 | I had to assign staff to other tasks than they are employed to do                                              | 26             | 6  | 7.92           | 11 | 9.59           | 9    | 0.15  |
| 11 | I had to move / lend out staff to other units / departments                                                    | 26             | 7  | 8.14           | 8  | 7.88           | 11   | 0.86  |
| 12 | I had the necessary resources to effectively care for patients and staff                                       | 24             | 6  | 6.50           | 7  | 7.43           | 11   | 0.62  |
| 13 | I was able to ensure that the patients' needs were met                                                         | 23             | 4  | 5.00           | 6  | 5.83           | 13   | 0.41  |
| 14 | I was able to answer patients' questions about COVID-19                                                        | 15             | 1  | 1.50           | 1  | 1.50           | 13   | 1.00  |
| 15 | I was concerned about the quality of treatment and care for our patients                                       | 22             | 6  | 8.50           | 12 | 10.00          | 4    | 0.12  |
| 16 | I was kept well informed by my own nearest leader                                                              | 26             | 8  | 6.19           | 3  | 5.50           | 15   | 0.11  |
| 17 | I was able to answer staff questions about COVID-19                                                            | 26             | 6  | 4.50           | 2  | 4.50           | 18   | 0.16  |
| 18 | I felt overloaded                                                                                              | 26             | 6  | 6.50           | 6  | 6.50           | 14   | 1.00  |
| 19 | I was concerned about the health and well-being of the staff                                                   | 26             | 12 | 9.50           | 6  | 9.50           | 8    | 0.18  |
| 20 | I was worried about my own health                                                                              | 26             | 12 | 8.25           | 3  | 7.00           | 11   | 0.02* |
| 21 | I was worried about my family's health                                                                         | 26             | 8  | 7.13           | 5  | 6.80           | 13   | 0.40  |
| 22 | I had the managerial competences I needed to effectively manage the situation                                  | 26             | 5  | 4.50           | 3  | 4.50           | 18   | 0.48  |
| 23 | Collaboration with the other leaders in my own department was adversely affected by the COVID-19 situation     | 26             | 8  | 7.19           | 5  | 6.70           | 13   | 0.38  |
| 24 | I experienced support from my leader colleagues in the rest of the organization                                | 26             | 5  | 6.60           | 6  | 5.50           | 15   | 1.00  |
| 25 | I was supported by the staff of my department / unit with the decisions I made                                 | 26             | 3  | 6.00           | 10 | 7.30           | 13   | 0.04* |
| 26 | The staff supported the decisions of the hospital management                                                   | 26             | 5  | 5.50           | 8  | 7.94           | 13   | 0.18  |
| 27 | I feel well prepared if a similar situation arise again                                                        | 26             | 10 | 8.25           | 5  | 7.50           | 11   | 0.16  |

Negative ranks (number of participants who scored lower in the second, than in the first questionnaire), positive ranks (number of participants who scored higher in the second, than in the first questionnaire), and ties (number of participants who scores the same in both questionnaires). Low scores represent "Always to Often" and high scores represent "Seldom to Never/Almost Never".

<sup>a</sup>The possibility to answer "not relevant in question 12 – 15 inflects on the N (and thereby the n's) as these answers are excluded to insure equality.

\* = P-values are considered significant when  $\leq 0.05$ .

Table 4: Comparing answers from Survey I and Survey II from leaders with a formal management education

| No | Question                                                                                                       | N <sup>a</sup> | n  | Negative ranks | n  | Positive ranks | Ties | P     |
|----|----------------------------------------------------------------------------------------------------------------|----------------|----|----------------|----|----------------|------|-------|
| 1  | I felt able to communicate quickly, clearly and transparently to my employees and collaborators                | 60             | 14 | 16.04          | 14 | 12.96          | 32   | 0.60  |
| 2  | I was able to work in a way that was consistent with my beliefs and values                                     | 60             | 22 | 19.30          | 13 | 15.81          | 25   | 0.06  |
| 3  | I have taken on management duties and responsibilities that I did not have before COVID-19                     | 60             | 19 | 21.53          | 18 | 16.33          | 23   | 0.36  |
| 4  | I had overview of the tasks my nearest leader assigned to me                                                   | 60             | 19 | 15.68          | 13 | 17.69          | 28   | 0.49  |
| 5  | I knew where to find factual knowledge of symptoms stage of the COVID-19 situation as it developed and disease | 60             | 14 | 15.61          | 15 | 14.43          | 31   | 0.98  |
| 6  | I was prepared for each stage of the COVID-19 situation as it developed                                        | 60             | 26 | 22.54          | 15 | 18.33          | 19   | 0.03* |
| 7  | I had meaningful tasks during the COVID-19 situation                                                           | 60             | 12 | 16.63          | 17 | 13.85          | 31   | 0.67  |
| 8  | I had influence on the decisions taken during the COVID-19 situation                                           | 60             | 25 | 20.66          | 13 | 17.27          | 22   | 0.03* |
| 9  | I took complex decisions during the COVID-19 situation                                                         | 60             | 20 | 18.18          | 13 | 15.19          | 27   | 0.13  |
| 10 | I had to assign staff to other tasks than they are employed to do                                              | 60             | 24 | 23.42          | 20 | 21.40          | 16   | 0.41  |
| 11 | I had to move / lend out staff to other units / departments                                                    | 60             | 9  | 13.78          | 18 | 14.11          | 33   | 0.11  |
| 12 | I had the necessary resources to effectively care for patients and staff                                       | 58             | 14 | 17.93          | 19 | 16.32          | 25   | 0.58  |
| 13 | I was able to ensure that that the patients' needs were met                                                    | 56             | 12 | 16.04          | 15 | 12.37          | 29   | 0.93  |
| 14 | I was able to answer patients' questions about COVID-19                                                        | 46             | 12 | 11.75          | 9  | 10.00          | 25   | 0.33  |
| 15 | I was concerned about the quality of treatment and care for our patients                                       | 54             | 13 | 16.27          | 21 | 18.26          | 20   | 0.13  |
| 16 | I was kept well informed by my own nearest leader                                                              | 60             | 15 | 12.03          | 9  | 13.28          | 36   | 0.35  |
| 17 | I was able to answer staff questions about COVID-19                                                            | 60             | 11 | 10.91          | 9  | 10.00          | 40   | 0.53  |
| 18 | I felt overloaded                                                                                              | 60             | 23 | 20.63          | 15 | 17.77          | 22   | 0.10  |
| 19 | I was concerned about the health and well-being of the staff                                                   | 60             | 17 | 20.26          | 21 | 18.88          | 22   | 0.68  |
| 20 | I was worried about my own health                                                                              | 60             | 23 | 18.70          | 11 | 15.00          | 26   | 0.01* |
| 21 | I was worried about my family's health                                                                         | 60             | 18 | 17.44          | 13 | 14.00          | 29   | 0.16  |
| 22 | I had the managerial competences I needed to effectively manage the situation                                  | 60             | 14 | 16.00          | 17 | 16.00          | 29   | 0.59  |
| 23 | Collaboration with the other leaders in my own department was adversely affected by the COVID-19 situation     | 60             | 21 | 17.50          | 14 | 18.75          | 25   | 0.37  |
| 24 | I experienced support from my leader colleagues in the rest of the organization                                | 60             | 18 | 18.00          | 18 | 19.00          | 24   | 0.88  |
| 25 | I was supported by the staff of my department / unit with the decisions I made                                 | 60             | 12 | 14.92          | 16 | 14.19          | 32   | 0.55  |
| 26 | The staff supported the decisions of the hospital management                                                   | 60             | 15 | 16.80          | 17 | 16.24          | 28   | 0.81  |
| 27 | I feel well prepared if a similar situation arise again                                                        | 60             | 18 | 16.42          | 14 | 16.61          | 28   | 0.51  |

Negative ranks (number of participants who scored lower in the second, than in the first questionnaire), positive ranks (number of participants who scored higher in the second, than in the first questionnaire), and ties (number of participants who scores the same in both questionnaires). Low scores represent "Always to Often" and high scores represent "Seldom to Never/Almost Never".

<sup>a</sup>The possibility to answer "not relevant in question 12 – 15 inflects on the N (and thereby the n's) as these answers are excluded to insure equality.

\* = P-values are considered significant when  $\leq 0.05$ .

Table 5: Comparing answers from Survey I and Survey II from leaders with 0 - 2 years of experience as a leader

| No | Question                                                                                                       | N <sup>a</sup> | n | Negative ranks | n | Positive ranks | Ties | P    |
|----|----------------------------------------------------------------------------------------------------------------|----------------|---|----------------|---|----------------|------|------|
| 1  | I felt able to communicate quickly, clearly and transparently to my employees and collaborators                | 10             | 1 | 1.50           | 1 | 1.50           | 8    | 1.00 |
| 2  | I was able to work in a way that was consistent with my beliefs and values                                     | 10             | 4 | 3.00           | 1 | 3.00           | 5    | 0.18 |
| 3  | I have taken on management duties and responsibilities that I did not have before COVID-19                     | 10             | 4 | 3.00           | 2 | 4.50           | 4    | 0.74 |
| 4  | I had overview of the tasks my nearest leader assigned to me                                                   | 10             | 2 | 3.00           | 3 | 3.00           | 5    | 0.66 |
| 5  | I knew where to find factual knowledge of symptoms stage of the COVID-19 situation as it developed and disease | 10             | 2 | 3.00           | 3 | 3.00           | 5    | 0.66 |
| 6  | I was prepared for each stage of the COVID-19 situation as it developed                                        | 10             | 3 | 5.33           | 5 | 4.00           | 2    | 0.76 |
| 7  | I had meaningful tasks during the COVID-19 situation                                                           | 10             | 2 | 3.75           | 3 | 2.50           | 5    | 1.00 |
| 8  | I had influence on the decisions taken during the COVID-19 situation                                           | 10             | 6 | 4.83           | 2 | 3.50           | 2    | 0.11 |
| 9  | I took complex decisions during the COVID-19 situation                                                         | 10             | 2 | 2.25           | 1 | 1.50           | 7    | 0.41 |
| 10 | I had to assign staff to other tasks than they are employed to do                                              | 10             | 5 | 4.00           | 3 | 5.33           | 2    | 0.76 |
| 11 | I had to move / lend out staff to other units / departments                                                    | 10             | 2 | 3.50           | 5 | 4.20           | 3    | 0.23 |
| 12 | I had the necessary resources to effectively care for patients and staff                                       | 10             | 5 | 4.80           | 3 | 4.00           | 2    | 0.37 |
| 13 | I was able to ensure that that the patients' needs were met                                                    | 10             | 1 | 1.50           | 2 | 2.25           | 7    | 0.41 |
| 14 | I was able to answer patients' questions about COVID-19                                                        | 8              | 2 | 2.00           | 1 | 2.00           | 5    | 0.56 |
| 15 | I was concerned about the quality of treatment and care for our patients                                       | 10             | 2 | 6.25           | 8 | 5.31           | 0    | 0.11 |
| 16 | I was kept well informed by my own nearest leader                                                              | 10             | 3 | 2.67           | 1 | 2.00           | 6    | 0.26 |
| 17 | I was able to answer staff questions about COVID-19                                                            | 10             | 3 | 2.50           | 1 | 2.50           | 6    | 0.32 |
| 18 | I felt overloaded                                                                                              | 10             | 6 | 4.00           | 2 | 6.00           | 2    | 0.37 |
| 19 | I was concerned about the health and well-being of the staff                                                   | 10             | 3 | 3.50           | 5 | 5.10           | 2    | 0.27 |
| 20 | I was worried about my own health                                                                              | 10             | 3 | 2.83           | 1 | 1.50           | 6    | 0.19 |
| 21 | I was worried about my family's health                                                                         | 10             | 1 | 3.50           | 5 | 3.50           | 4    | 0.10 |
| 22 | I had the managerial competences I needed to effectively manage the situation                                  | 10             | 2 | 2.00           | 1 | 2.00           | 7    | 0.56 |
| 23 | Collaboration with the other leaders in my own department was adversely affected by the COVID-19 situation     | 10             | 2 | 2.00           | 1 | 2.00           | 7    | 0.56 |
| 24 | I experienced support from my leader colleagues in the rest of the organization                                | 10             | 1 | 1.00           | 0 | 0.00           | 9    | 0.32 |
| 25 | I was supported by the staff of my department / unit with the decisions I made                                 | 10             | 1 | 3.00           | 4 | 3.00           | 5    | 0.18 |
| 26 | The staff supported the decisions of the hospital management                                                   | 10             | 2 | 1.50           | 0 | 0.00           | 8    | 0.18 |
| 27 | I feel well prepared if a similar situation arise again                                                        | 10             | 1 | 2.00           | 2 | 2.00           | 7    | 0.56 |

Negative ranks (number of participants who scored lower in the second, than in the first questionnaire), positive ranks (number of participants who scored higher in the second, than in the first questionnaire), and ties (number of participants who scores the same in both questionnaires). Low scores represent "Always to Often" and high scores represent "Seldom to Never/Almost Never".

<sup>a</sup>The possibility to answer "not relevant in question 12 – 15 inflects on the N (and thereby the n's) as these answers are excluded to insure equality.

Table 6: Comparing answers from Survey I and Survey II from leaders with 5 or more years of experience as a leader

| No | Question                                                                                                       | N <sup>a</sup> | n  | Negative ranks | n  | Positive ranks | Ties | P     |
|----|----------------------------------------------------------------------------------------------------------------|----------------|----|----------------|----|----------------|------|-------|
| 1  | I felt able to communicate quickly, clearly and transparently to my employees and collaborators                | 57             | 13 | 13.35          | 11 | 11.50          | 33   | 0.46  |
| 2  | I was able to work in a way that was consistent with my beliefs and values                                     | 57             | 17 | 15.41          | 12 | 14.42          | 28   | 0.31  |
| 3  | I have taken on management duties and responsibilities that I did not have before COVID-19                     | 57             | 17 | 21.35          | 20 | 17.00          | 20   | 0.86  |
| 4  | I had overview of the tasks my nearest leader assigned to me                                                   | 57             | 18 | 13.00          | 9  | 16.00          | 30   | 0.25  |
| 5  | I knew where to find factual knowledge of symptoms stage of the COVID-19 situation as it developed and disease | 57             | 12 | 14.17          | 14 | 12.93          | 31   | 0.88  |
| 6  | I was prepared for each stage of the COVID-19 situation as it developed                                        | 57             | 25 | 20.78          | 13 | 17.04          | 19   | 0.02* |
| 7  | I had meaningful tasks during the COVID-19 situation                                                           | 57             | 10 | 14.10          | 14 | 11.36          | 33   | 0.78  |
| 8  | I had influence on the decisions taken during the COVID-19 situation                                           | 57             | 23 | 19.52          | 13 | 16.69          | 21   | 0.05* |
| 9  | I took complex decisions during the COVID-19 situation                                                         | 57             | 17 | 15.06          | 12 | 14.92          | 28   | 0.39  |
| 10 | I had to assign staff to other tasks than they are employed to do                                              | 57             | 17 | 19.50          | 19 | 17.61          | 21   | 0.98  |
| 11 | I had to move / lend out staff to other units / departments                                                    | 57             | 11 | 13.55          | 16 | 14.31          | 30   | 0.32  |
| 12 | I had the necessary resources to effectively care for patients and staff                                       | 54             | 12 | 13.88          | 16 | 14.97          | 26   | 0.38  |
| 13 | I was able to ensure that that the patients' needs were met                                                    | 49             | 12 | 14.08          | 13 | 12.00          | 24   | 0.85  |
| 14 | I was able to answer patients' questions about COVID-19                                                        | 40             | 8  | 8.88           | 7  | 7.00           | 25   | 0.50  |
| 15 | I was concerned about the quality of treatment and care for our patients                                       | 46             | 11 | 14.59          | 19 | 16.03          | 16   | 0.13  |
| 16 | I was kept well informed by my own nearest leader                                                              | 57             | 16 | 11.38          | 6  | 11.83          | 35   | 0.05* |
| 17 | I was able to answer staff questions about COVID-19                                                            | 57             | 10 | 9.50           | 8  | 9.50           | 39   | 0.64  |
| 18 | I felt overloaded                                                                                              | 57             | 17 | 17.15          | 14 | 14.61          | 26   | 0.36  |
| 19 | I was concerned about the health and well-being of the staff                                                   | 57             | 17 | 18.88          | 17 | 16.12          | 23   | 0.66  |
| 20 | I was worried about my own health                                                                              | 57             | 22 | 17.50          | 11 | 16.00          | 24   | 0.04* |
| 21 | I was worried about my family's health                                                                         | 57             | 21 | 17.19          | 12 | 16.67          | 24   | 0.12  |
| 22 | I had the managerial competences I needed to effectively manage the situation                                  | 57             | 13 | 15.00          | 16 | 15.00          | 28   | 0.58  |
| 23 | Collaboration with the other leaders in my own department was adversely affected by the COVID-19 situation     | 57             | 18 | 15.56          | 14 | 17.71          | 25   | 0.75  |
| 24 | I experienced support from my leader colleagues in the rest of the organization                                | 57             | 16 | 17.13          | 17 | 16.88          | 24   | 0.90  |
| 25 | I was supported by the staff of my department / unit with the decisions I made                                 | 57             | 13 | 14.85          | 16 | 15.13          | 28   | 0.57  |
| 26 | The staff supported the decisions of the hospital management                                                   | 57             | 12 | 15.29          | 19 | 16.45          | 26   | 0.18  |
| 27 | I feel well prepared if a similar situation arise again                                                        | 57             | 17 | 15.91          | 14 | 16.11          | 26   | 0.62  |

Negative ranks (number of participants who scored lower in the second, than in the first questionnaire), positive ranks (number of participants who scored higher in the second, than in the first questionnaire), and ties (number of participants who scores the same in both questionnaires). Low scores represent "Always to Often" and high scores represent "Seldom to Never/Almost Never".

<sup>a</sup>The possibility to answer "not relevant in question 12 – 15 inflects on the N (and thereby the n's) as these answers are excluded to insure equality.

\* = P-values are considered significant when  $\leq 0.05$
